# Supplementary material for: Circulating Cell-Free DNA Profiling Predicts the Therapeutic Outcome in Advanced Hepatocellular Carcinoma Patients Treated with Combination Immunotherapy
Source: MDPI journal article supplement (doi:10.3390/cancers14143367), 2022-07-11
Supplement: s1 [file s1]

Supplementary Table S1. Gene list in a custom panel for ctDNA detection

| Gene name |
|-----------|
| ALB       |
| APC       |
| APOB      |
| ARID1A    |
| ARID2     |
| AXIN1     |
| BAP1      |
| CTNNB1    |
| EGFR      |
| FGF19     |
| IL6ST     |
| JAK1      |
| KEAP1     |
| KRAS      |
| LRP1B     |
| MET       |
| NFE2L2    |
| NRAS      |
| PIK3CA    |
| PTEN      |
| RB1       |
| TERT      |
| TP53      |
| TSC2      |
| VEGFA     |

Supplementary Table S2. Clinical characteristics of 85 HCC patients stratified by cfDNA levels

| Factor                    | Unit                               | cfDNA HIGH           | cfDNA LOW            | <i>p</i> value |
|---------------------------|------------------------------------|----------------------|----------------------|----------------|
| Age                       | Years Old                          | 73(66-81)            | 75(64-79)            | 0.790          |
| Gender                    | Male/Female                        | 30/13                | 36/6                 | 0.078          |
| ECOG PS                   | 0/1                                | 37/6                 | 39/3                 | 0.308          |
| Etiology                  | HBV/HCV/HBV+HCV/<br>alcohol/others | 12/15/2/5/9          | 10/14/0/10/8         | 0.416          |
| Child-pugh                | 5/6/7                              | 17/23/3              | 24/17/1              | 0.214          |
| PT                        | %                                  | 86(79-100)           | 92(86-103)           | 0.391          |
| ALB                       | g/dL                               | 3.6(3.1-3.9)         | 3.7(3.4-3.9)         | 0.054          |
| T-BIL                     | mg/dL                              | 0.8(0.6-1.2)         | 0.7(0.5-0.9)         | 0.065          |
| ALBI score                |                                    | -2.26(-2.69 - -1.85) | -2.52(-2.72 - -2.15) | 0.024          |
| ALT                       | U/L                                | 31(16-42)            | 25(17-31)            | 0.424          |
| PLT                       | ×10 <sup>4</sup> /μL               | 13.6(9.4-16.8)       | 14.1(12.8-19.5)      | 0.218          |
| NLR                       |                                    | 2.4(2.0-3.5)         | 2.3(1.6-3.7)         | 0.849          |
| AFP                       | ng/mL                              | 78(6-3844)           | 6(3-297)             | 0.273          |
| DCP                       | mAU/mL                             | 417(80-3159)         | 216(60-2793)         | 0.264          |
| Prior systemic therapy    | Yes/No                             | 21/22                | 16/26                | 0.318          |
| Extrahepatic metastasis   | Yes/No                             | 17/26                | 21/21                | 0.332          |
| Macrovascular invasion    | Yes/No                             | 8/35                 | 7/35                 | 0.815          |
| Maximal tumor size        | cm                                 | 2.4(1.7-5.6)         | 2.0(1.2-4.2)         | 0.135          |
| Intrahepatic tumor number | ≥5/≤4                              | 21/22                | 15/27                | 0.221          |
| BCLC stage                | A/B/C                              | 3/18/22              | 3/13/26              | 0.569          |

Abbreviations: cfDNA, cell free DNA; ECOG, Eastern Cooperative Oncology Group; HBV, hepatitis B virus  
HCV, hepatitis C virus; PT, prothrombin time; ALB, albumin; T-Bil, total bilirubin; ALBI, Albumin-Bilirubin  
ALT, alanine aminotransferase; PLT, platelet; NLR, neutrophil-lymphocyte ratio; AFP, alpha-fetoprotein  
DCP, des-γ-carboxy prothrombin; BCLC, Barcelona clinic liver cancer

Supplementary Table S3. Clinical characteristics of 85 HCC patients stratified by presence or absence of ctDNA

| Factor                       | Unit                               | ctDNA(+) (N=48)      | ctDNA(-) (N=37)      | p value |
|------------------------------|------------------------------------|----------------------|----------------------|---------|
| Age                          | Years Old                          | 75(63-80)            | 72(67-79)            | 0.827   |
| Gender                       | Male/Female                        | 37/11                | 29/8                 | 0.887   |
| ECOG PS                      | 0/1                                | 8/40                 | 1/36                 | 0.038   |
| Etiology                     | HBV/HCV/HBV+HCV<br>/alcohol/others | 13/17/0/10/8         | 9/12/2/5/9           | 0.412   |
| Child-pugh                   | 5/6/7                              | 21/25/2              | 20/15/2              | 0.571   |
| PT                           | %                                  | 88(82-102)           | 94(82-104)           | 0.382   |
| ALB                          | g/dL                               | 3.6(3.2-3.9)         | 3.7(3.3-4.0)         | 0.307   |
| T-BIL                        | mg/dL                              | 0.7(0.5-1.2)         | 0.7(0.6-1.0)         | 0.580   |
| ALBI score                   |                                    | -2.31(-2.67 - -2.02) | -2.43(-2.73 - -2.03) | 0.355   |
| ALT                          | U/L                                | 29(16-35)            | 25(17-36)            | 0.903   |
| PLT                          | $\times 10^4/\mu\text{L}$          | 13.7(10.3-19.2)      | 14.4(12.4-16.5)      | 0.354   |
| NLR                          |                                    | 3.1(2.0-4.2)         | 2.0(1.5-2.6)         | 0.003   |
| AFP                          | ng/mL                              | 67(4-1796)           | 7(3-105)             | 0.932   |
| DCP                          | mAU/mL                             | 424(96-5342)         | 127(41-1091)         | 0.943   |
| Prior systemic<br>therapy    | Yes/No                             | 21/27                | 16/21                | 0.963   |
| Extrahepatic<br>metastasis   | Yes/No                             | 20/28                | 18/19                | 0.521   |
| Macrovascular<br>invasion    | Yes/No                             | 12/36                | 3/34                 | 0.043   |
| Maximal tumor size           | cm                                 | 2.8(1.6-6.2)         | 1.9(1.5-3.2)         | 0.011   |
| Intrahepatic tumor<br>number | $\geq 5/\leq 4$                    | 22/26                | 14/23                | 0.460   |
| BCLC stage                   | A/B/C                              | 2/18/28              | 4/13/20              | 0.495   |
| cfDNA                        | ng/uL                              | 2.26(1.20-3.91)      | 2.22(1.39-3.70)      | 0.210   |

Abbreviations: ctDNA, circulating tumor DNA; ECOG, Eastern Cooperative Oncology Group

HBV, hepatitis B virus; HCV, hepatitis C virus; PT, prothrombin time; ALB, albumin; T-Bil, total bilirubin

ALBI, Albumin-Bilirubin; ALT, alanine aminotransferase; PLT, platelet; NLR, neutrophil-lymphocyte ratio

AFP, alpha-fetoprotein; DCP, des- $\gamma$ -carboxy prothrombin; BCLC, Barcelona clinic liver cancer

cfDNA, cell free DNA

Supplementary Table S4. Clinical characteristics of 85 HCC patients stratified by presence or absence of TERT ctDNA mutation

| Factor                    | Unit                               | TERT(+) (N=26)       | TERT(-)(N=59)        | p value |
|---------------------------|------------------------------------|----------------------|----------------------|---------|
| Age                       | Years Old                          | 78(71-83)            | 72(62-78)            | 0.023   |
| Gender                    | Male/Female                        | 20/6                 | 46/13                | 0.915   |
| ECOG PS                   | 0/1                                | 23/3                 | 53/6                 | 0.850   |
| Etiology                  | HBV/HCV/HBV+HCV<br>/alcohol/others | 5/8/0/7/6            | 17/21/2/8/11         | 0.456   |
| Child-pugh                | 5/6/7                              | 6/18/2               | 35/22/2              | 0.009   |
| PT                        | %                                  | 83(81-96)            | 94(84-103)           | 0.040   |
| ALB                       | g/dL                               | 3.3(3.1-3.6)         | 3.8(3.5-4.0)         | 0.0004  |
| T-BIL                     | mg/dL                              | 0.8(0.5-1.3)         | 0.7(0.6-0.9)         | 0.158   |
| ALBI score                |                                    | -2.06(-2.39 - -1.76) | -2.52(-2.73 - -2.23) | 0.0006  |
| ALT                       | U/L                                | 31(14-36)            | 26(17-34)            | 0.854   |
| PLT                       | ×10 <sup>4</sup> /μL               | 12.8(8.8-16.7)       | 14.3(12.6-18.2)      | 0.228   |
| NLR                       |                                    | 2.7(1.7-3.7)         | 2.3(1.8-3.4)         | 0.700   |
| AFP                       | ng/mL                              | 10(3-660)            | 20(4-981)            | 0.944   |
| DCP                       | mAU/mL                             | 759(143-4494)        | 187(49-1317)         | 0.784   |
| Prior systemic therapy    | Yes/No                             | 11/15                | 26/33                | 0.880   |
| Extrahepatic metastasis   | Yes/No                             | 7/19                 | 31/28                | 0.029   |
| Macrovascular invasion    | Yes/No                             | 6/20                 | 9/50                 | 0.383   |
| Maximal tumor size        | cm                                 | 2.4(1.6-5.8)         | 2.1(1.6-4.3)         | 0.332   |
| Intrahepatic tumor number | ≥5/≤4                              | 15/11                | 21/38                | 0.057   |
| BCLC stage                | A/B/C                              | 1/13/12              | 5/18/36              | 0.209   |
| cfDNA                     | ng/uL                              | 3.17(2.05-5.58)      | 1.97(1.11-2.93)      | 0.020   |

Abbreviations: TERT, telomerase reverse transcriptase; ctDNA, circulating tumor DNA

ECOG, Eastern Cooperative Oncology Group; HBV, hepatitis B virus; HCV, hepatitis C virus

PT, prothrombin time; ALB, albumin; T-Bil, total bilirubin; ALBI, Albumin-Bilirubin

ALT, alanine aminotransferase; PLT, platelet; NLR, neutrophil-lymphocyte ratio; AFP, alpha-fetoprotein

DCP, des-γ-carboxy prothrombin; BCLC, Barcelona clinic liver cancer; cfDNA, cell free DNA

Supplementary Table S5. Clinical characteristics of 85 HCC patients stratified by presence or absence of TP53 ctDNA mutation

| Factor                       | Unit                               | TP53(+) (N=19)       | TP53(-)(N=66)        | p value |
|------------------------------|------------------------------------|----------------------|----------------------|---------|
| Age                          | Years Old                          | 75(68-80)            | 74(64-80)            | 0.892   |
| Gender                       | Male/Female                        | 17/2                 | 49/17                | 0.160   |
| ECOG PS                      | 0/1                                | 16/3                 | 60/6                 | 0.403   |
| Etiology                     | HBV/HCV/HBV+HCV/<br>alcohol/others | 5/8/0/4/2            | 17/21/2/11/15        | 0.682   |
| Child-pugh                   | 5/6/7                              | 9/9/1                | 32/31/3              | 0.990   |
| PT                           | %                                  | 91(82-104)           | 92(82-100)           | 0.483   |
| ALB                          | g/dL                               | 3.6(3.1-3.8)         | 3.7(3.2-4.0)         | 0.275   |
| T-BIL                        | mg/dL                              | 0.7(0.4-0.9)         | 0.7(0.6-1.0)         | 0.417   |
| ALBI score                   |                                    | -2.36(-2.68 - -1.80) | -2.34(-2.71 - -2.02) | 0.518   |
| ALT                          | U/L                                | 29(19-36)            | 26(16-35)            | 0.254   |
| PLT                          | ×10 <sup>4</sup> /μL               | 13.8(11.0-23.3)      | 13.8(11.2-16.3)      | 0.024   |
| NLR                          |                                    | 3.2(2.0-4.4)         | 2.3(1.8-3.4)         | 0.153   |
| AFP                          | ng/mL                              | 88(5-3492)           | 11(3-297)            | 0.294   |
| DCP                          | mAU/mL                             | 759(272-11365)       | 175(52-1772)         | 0.378   |
| Prior systemic<br>therapy    | Yes/No                             | 10/9                 | 27/39                | 0.364   |
| Extrahepatic<br>metastasis   | Yes/No                             | 6/13                 | 32/34                | 0.192   |
| Macrovascular<br>invasion    | Yes/No                             | 5/14                 | 10/56                | 0.261   |
| Maximal tumor size           | cm                                 | 2.4(1.7-7.0)         | 2.2(1.5-4.5)         | 0.594   |
| Intrahepatic tumor<br>number | ≥5/≤4                              | 11/8                 | 41/25                | 0.120   |
| BCLC stage                   | A/B/C                              | 0/9/10               | 6/22/38              | 0.274   |
| cfDNA                        | ng/uL                              | 1.89(0.88-3.11)      | 2.30(1.40-3.93)      | 0.287   |

Abbreviations: TERT, telomerase reverse transcriptase; ctDNA, circulating tumor DNA

ECOG, Eastern Cooperative Oncology Group; HBV, hepatitis B virus; HCV, hepatitis C virus

PT, prothrombin time; ALB, albumin; T-Bil, total bilirubin; ALBI, Albumin-Bilirubin

ALT, alanine aminotransferase; PLT, platelet; NLR, neutrophil-lymphocyte ratio; AFP, alpha-fetoprotein

DCP, des-γ-carboxy prothrombin; BCLC, Barcelona clinic liver cancer; cfDNA, cell free DNA

Supplementary Table S6. Clinical characteristics of 85 HCC patients stratified by presence or absence of CTNNB1 ctDNA mutation

| Factor                       | Unit                               | CTNNB1(+) (N=13)     | CTNNB1(-)(N=72)      | p value |
|------------------------------|------------------------------------|----------------------|----------------------|---------|
| Age                          | Years Old                          | 69(57-80)            | 75(68-80)            | 0.131   |
| Gender                       | Male/Female                        | 11/2                 | 55/17                | 0.512   |
| ECOG PS                      | 0/1                                | 13/0                 | 63/9                 | 0.178   |
| Etiology                     | HBV/HCV/HBV+HCV/<br>alcohol/others | 3/6/0/2/2            | 19/23/2/13/15        | 0.867   |
| Child-pugh                   | 5/6/7                              | 6/6/1                | 35/34/3              | 0.858   |
| PT                           | %                                  | 87(79-96)            | 94(82-102)           | 0.149   |
| ALB                          | g/dL                               | 3.8(3.1-4.1)         | 3.7(3.2-3.9)         | 0.763   |
| T-BIL                        | mg/dL                              | 0.8(0.5-1.4)         | 0.7(0.5-1.0)         | 0.266   |
| ALBI score                   |                                    | -2.32(-2.79 - -1.91) | -2.35(-2.69 - -2.09) | 0.991   |
| ALT                          | U/L                                | 30(14-41)            | 26(17-35)            | 0.855   |
| PLT                          | ×10 <sup>4</sup> /μL               | 13.4(11.0-15.2)      | 14.0(11.1-18.4)      | 0.516   |
| NLR                          |                                    | 3.1(1.9-4.2)         | 2.4(1.8-3.5)         | 0.568   |
| AFP                          | ng/mL                              | 5(3-1023)            | 20(4-757)            | 0.397   |
| DCP                          | mAU/mL                             | 197(58-618)          | 356(66-3824)         | 0.358   |
| Prior systemic<br>therapy    | Yes/No                             | 9/4                  | 28/44                | 0.042   |
| Extrahepatic<br>metastasis   | Yes/No                             | 5/8                  | 33/39                | 0.623   |
| Macrovascular<br>invasion    | Yes/No                             | 5/8                  | 10/62                | 0.032   |
| Maximal tumor size           | cm                                 | 2.3(0.8-4.9)         | 2.3(1.6-4.5)         | 0.959   |
| Intrahepatic tumor<br>number | ≥5/≤4                              | 5/8                  | 31/41                | 0.758   |
| BCLC stage                   | A/B/C                              | 0/5/8                | 6/26/40              | 0.557   |
| cfDNA                        | ng/uL                              | 2.35(0.87-6.34)      | 2.23(1.38-3.59)      | 0.164   |

Abbreviations: TERT, telomerase reverse transcriptase; ctDNA, circulating tumor DNA

ECOG, Eastern Cooperative Oncology Group; HBV, hepatitis B virus; HCV, hepatitis C virus

PT, prothrombin time; ALB, albumin; T-Bil, total bilirubin; ALBI, Albumin-Bilirubin

ALT, alanine aminotransferase; PLT, platelet; NLR, neutrophil-lymphocyte ratio; AFP, alpha-fetoprotein

DCP, des-γ-carboxy prothrombin; BCLC, Barcelona clinic liver cancer; cfDNA, cell free DNA

Supplementary Table S7. Cox proportional hazards regression model for the prediction of progression free survival

| Factor                    | Unit                 |                 | Univariate analysis  |         | Multivariate analysis |         |
|---------------------------|----------------------|-----------------|----------------------|---------|-----------------------|---------|
|                           |                      |                 | Hazard ratio(95% CI) | p value | Hazard ratio(95% CI)  | p value |
| Age                       | Years Old            | ≥ 70/<70        | 0.60(0.34-1.06)      | 0.076   |                       |         |
| Gender                    |                      | Male/Female     | 1.05(0.56-1.97)      | 0.876   |                       |         |
| ECOG PS                   |                      | 0/1             | 0.95(0.40-2.22)      | 0.900   |                       |         |
| Etiology                  |                      | Viral/non-Viral | 1.18(0.67-2.07)      | 0.571   |                       |         |
| PT                        | %                    | ≥ 90/<90        | 1.23(0.69-2.19)      | 0.483   |                       |         |
| ALB                       | g/dL                 | ≥ 4.0/<4.0      | 1.21(0.65-2.23)      | 0.547   |                       |         |
| T-BIL                     | mg/dL                | ≥ 0.7/<0.7      | 0.70(0.41-1.21)      | 0.202   |                       |         |
| ALBI score                |                      | ≥ -2.27/<-2.27  | 0.81(0.47-1.40)      | 0.812   |                       |         |
| ALT                       | U/L                  | ≥ 45/<45        | 1.00(0.47-2.13)      | 0.998   |                       |         |
| PLT                       | ×10 <sup>4</sup> /μL | ≥ 15/<15        | 1.07(0.61-1.90)      | 0.804   |                       |         |
| NLR                       |                      | ≥ 3.0/<3.0      | 2.07(1.19-3.59)      | 0.010   | 1.78(0.94-3.39)       | 0.077   |
| AFP                       | ng/mL                | ≥ 400/<400      | 2.00(1.13-3.55)      | 0.018   | 1.59(0.87-2.93)       | 0.132   |
| DCP                       | mAU/mL               | ≥ 200/<200      | 1.69(0.96-2.97)      | 0.069   |                       |         |
| Prior systemic therapy    |                      | Yes/No          | 1.83(1.06-3.14)      | 0.030   | 1.69(0.96-2.97)       | 0.068   |
| Extrahepatic metastasis   |                      | Yes/No          | 1.18(0.69-2.03)      | 0.542   |                       |         |
| Macrovascular invasion    |                      | Yes/No          | 3.15(1.70-5.85)      | 0.0003  | 2.67(1.36-5.24)       | 0.004   |
| Intrahepatic tumor number |                      | ≥ 5/≤ 4         | 2.75(1.57-4.81)      | 0.0004  | 2.70(1.52-4.80)       | 0.001   |
| BCLC stage                |                      | A,B/C           | 0.60(0.34-1.05)      | 0.075   |                       |         |
| cfDNA                     | ng/uL                | ≥ 2.23/<2.23    | 1.89(1.09-3.27)      | 0.023   | 1.58(0.91-2.77)       | 0.106   |
| TERT                      |                      | Yes/No          | 1.06(0.58-1.95)      | 0.838   |                       |         |

Abbreviations: ECOG, Eastern Cooperative Oncology Group; PT, prothrombin time

ALB, albumin; T-Bil, total bilirubin; ALBI, Albumin-Bilirubin; ALT, alanine aminotransferase

PLT, platelet; NLR, neutrophil-lymphocyte ratio; AFP, alpha-fetoprotein; DCP, des-γ-carboxy prothrombin

BCLC, Barcelona clinic liver cancer; cfDNA, cell free DNA; TERT, telomerase reverse transcriptase

## Supplementary Figure Legends

**Supplementary Figure S1.** Association between cfDNA levels and clinicopathological variables in 85 u-HCC patients treated with Atezo/Bev. cfDNA, cell-free DNA; u-HCC, unresectable hepatocellular carcinoma; Atezo/Bev, atezolizumab and bevacizumab.

**Supplementary Figure S2.** A total of 85 u-HCC patients treated with Atezo/Bev were divided into 2 groups by the presence or absence of ctDNA. **(A)** cfDNA levels in each group. **(B-C)** The best overall response rate (ORR) **(B)** and disease control rate (DCR) **(C)** in each group. **(C-D)** The Kaplan–Meier curves of progression-free survival (PFS) **(C)** and overall survival (OS) **(D)** for each group. ctDNA, circulating tumor DNA; u-HCC, unresectable hepatocellular carcinoma; Atezo/Bev, atezolizumab and bevacizumab; CR, complete response; PR, partial response; SD, stable disease; PD, progressing disease.

**Supplementary Figure S3.** A total of 85 u-HCC patients treated with Atezo/Bev were divided into 2 groups based on the presence or absence of specific ctDNA mutations, including TERT **(A, D)**, TP53 **(B, E)**, and CTNNB1 **(C, F)** mutations. The best overall response rate (ORR) **(A-C)** and disease control rate (DCR) **(D-F)** in each group. ctDNA, circulating tumor DNA; u-



HCC, unresectable hepatocellular carcinoma; Atezo/Bev, atezolizumab and bevacizumab.

**Supplementary Figure S4.** A total 85 u-HCC patients treated with Atezo/Bev were divided into 4 groups based on the AFP levels and/or the presence or absence of TERT ctDNA mutation. The Kaplan–Meier curves of overall survival (OS) for each group. ctDNA, circulating tumor DNA; u-HCC, unresectable hepatocellular carcinoma; Atezo/Bev, Atezolizumab and bevacizumab.

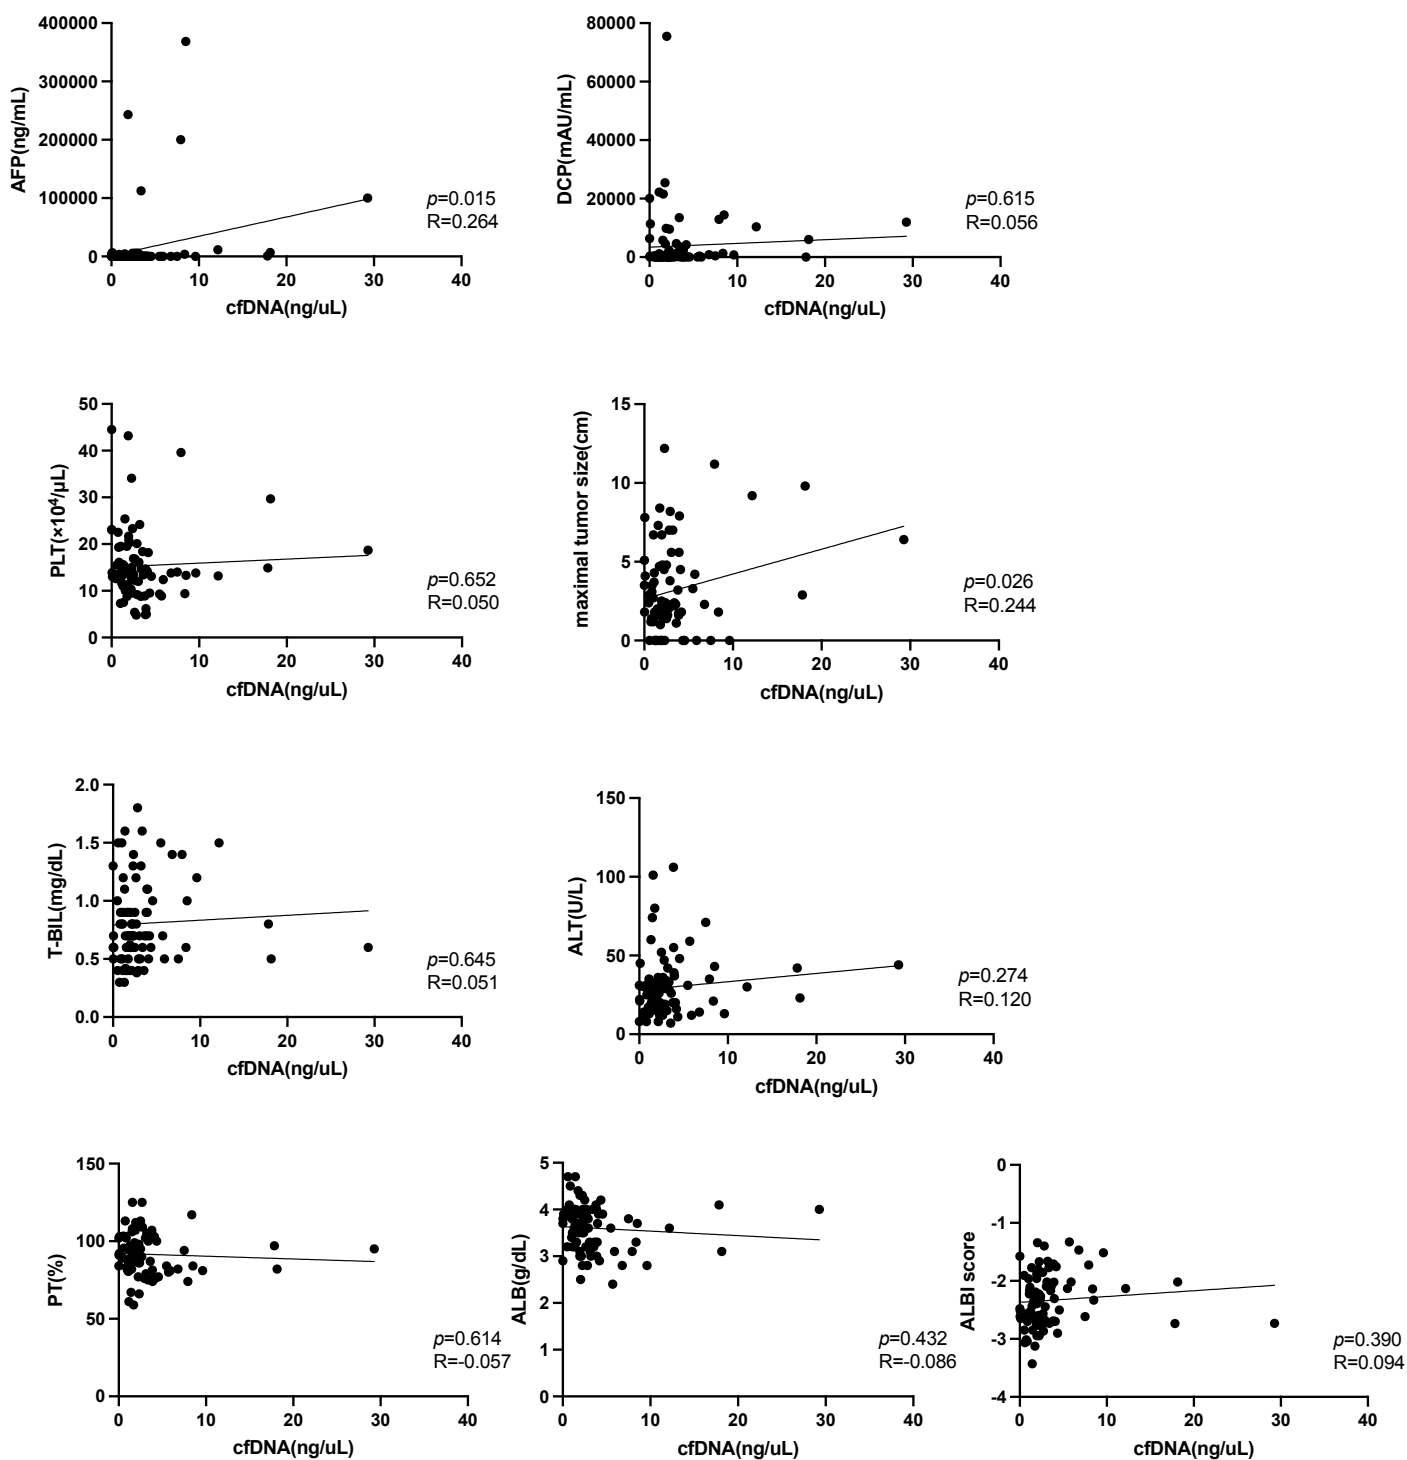

Supplementary Figure S1

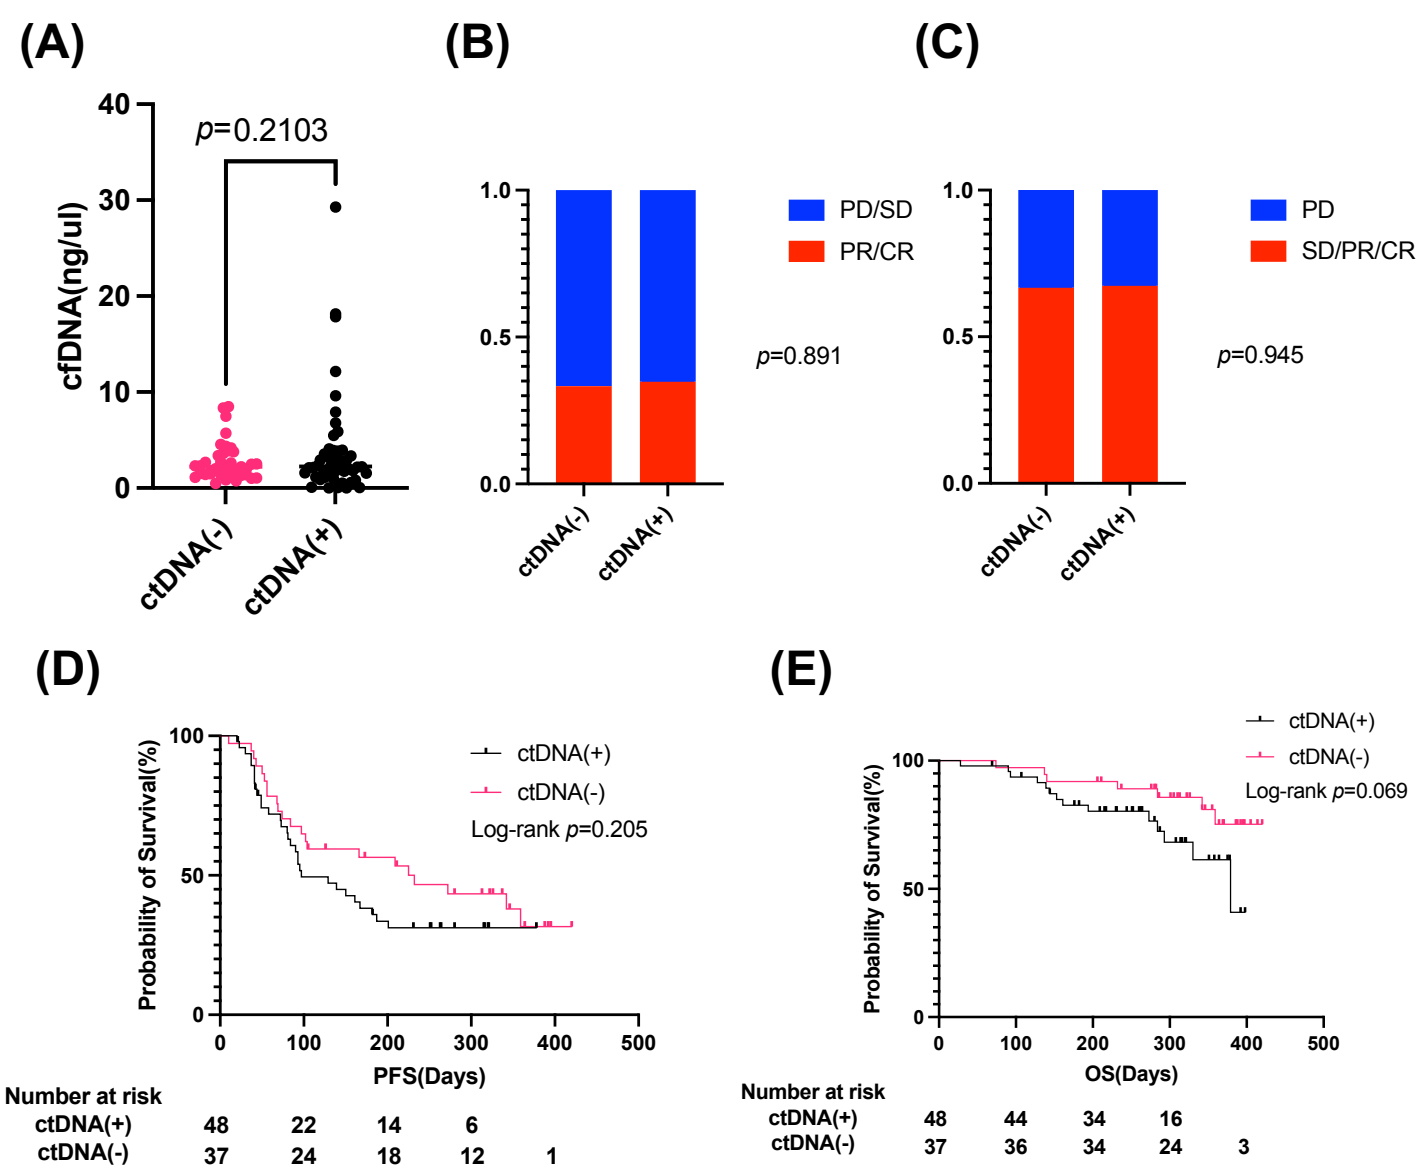

**Supplementary Figure S2**

ORR

(A)

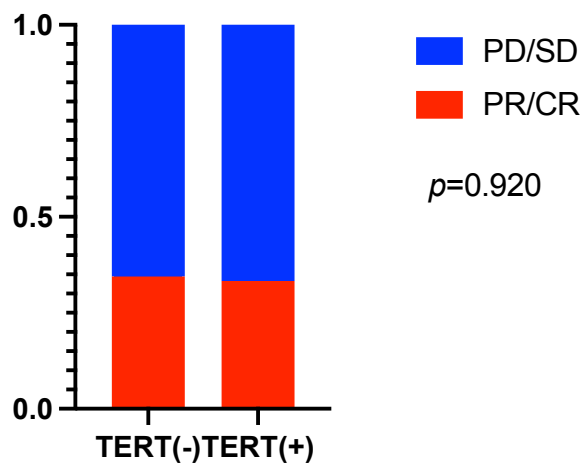

DCR

(D)

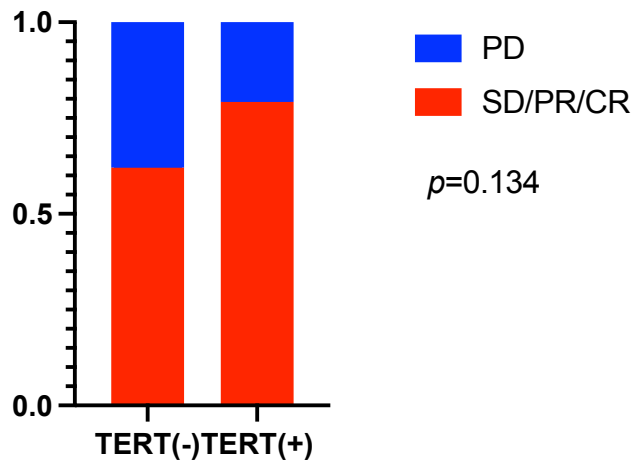

(B)

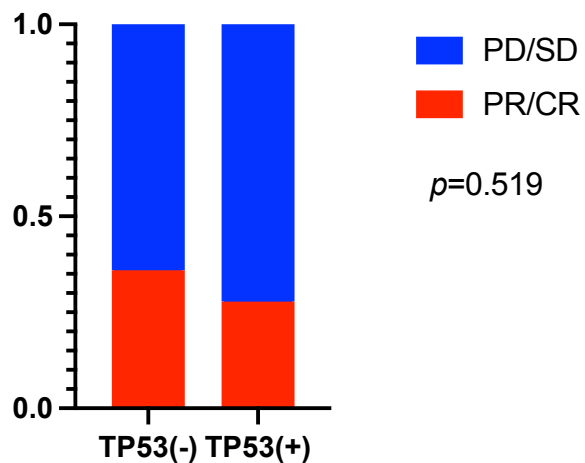

(E)

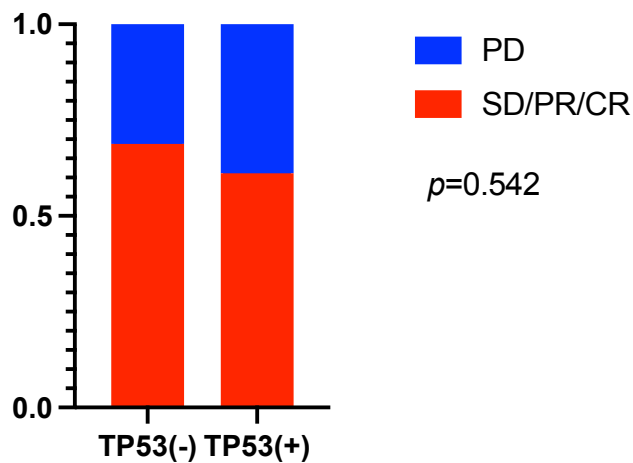

(C)

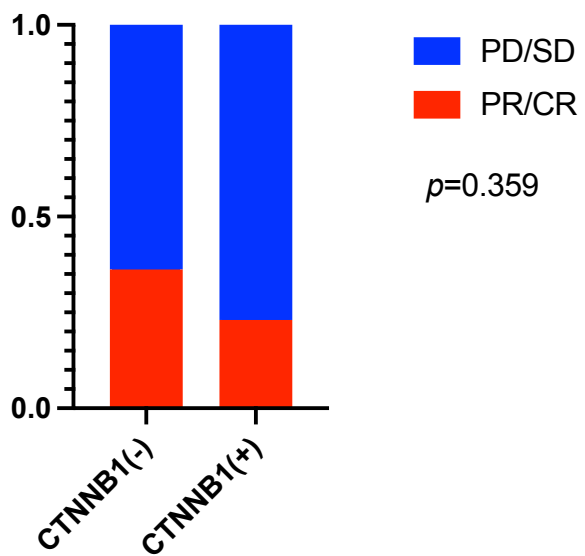

(F)

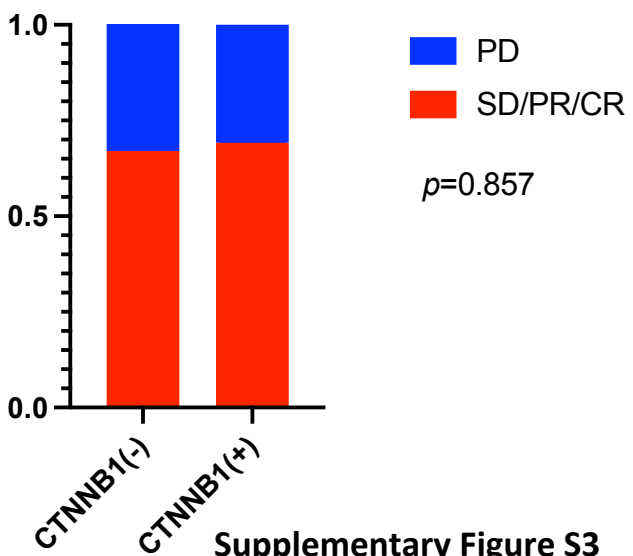

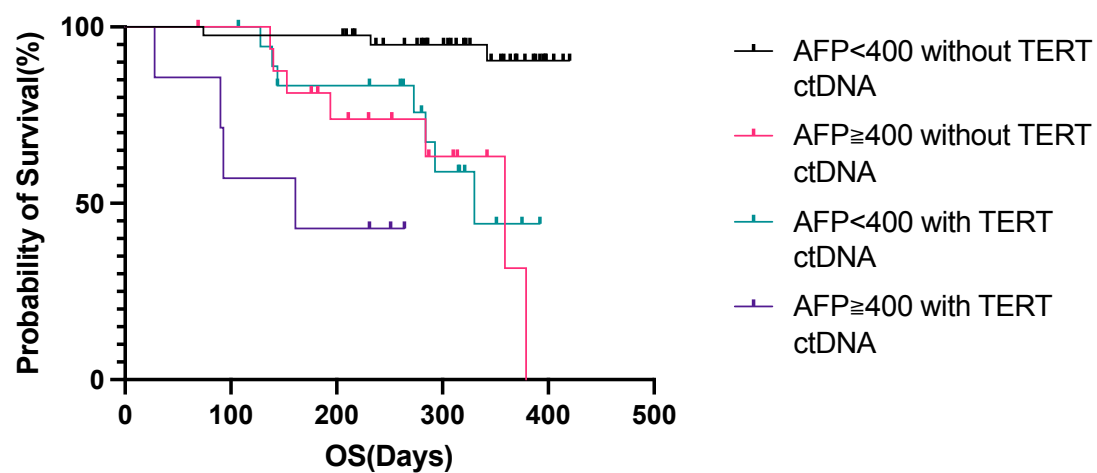

| survival rate                     |     |     |    |    |    |
|-----------------------------------|-----|-----|----|----|----|
| AFP<400 without TERT ctDNA        | 100 | 98  | 98 | 95 | 90 |
| AFP $\geq$ 400 without TERT ctDNA | 100 | 100 | 74 | 63 |    |
| AFP<400 with TERT ctDNA           | 100 | 100 | 83 | 59 |    |
| AFP $\geq$ 400 with TERT ctDNA    | 100 | 57  | 43 |    |    |

**Supplementary Figure S4**
